# Supplementary material for: Expression of NK Cell Receptor Ligands on Leukemic Cells Is Associated with the Outcome of Childhood Acute Leukemia
Source: MDPI journal article supplement (doi:10.3390/cancers13102294), 2021-05-11
Supplement: s1 [file s1]

Table S1. HLA-I allele frequencies in controls and patients.

| HLA-allotype     | Controls<br>(n = 83) | Patients<br>(n = 102)          | B-ALL<br>(n = 70) | T-ALL<br>(n = 16) | AML<br>(n = 16) |
|------------------|----------------------|--------------------------------|-------------------|-------------------|-----------------|
| <b>HLA-A *01</b> | 20 (24.1 %)          | 21 (21.6 %)                    | 16 (24.6 %)       | 3 (18.8 %)        | 2 (12.5 %)      |
| *02              | 29 (34.9 %)          | 37 (38.1 %)                    | 29 (44.6 %)       | 4 (25.0 %)        | 4 (25.0 %)      |
| *03              | 12 (14.5 %)          | 19 (19.6 %)                    | 11 (16.9 %)       | 4 (25.0 %)        | 4 (25.0 %)      |
| *11              | 11 (13.3 %)          | 14 (14.4 %)                    | 12 (18.5 %)       | 0 (0 %)           | 2 (12.5 %)      |
| *23              | 5 (6.0 %)            | 7 (7.2 %)                      | 5 (7.7 %)         | 0 (0 %)           | 2 (12.5 %)      |
| *24              | 18 (21.7 %)          | 21 (21.6 %)                    | 14 (21.5 %)       | 4 (25.0 %)        | 3 (18.8 %)      |
| *25              | 1 (1.2 %)            | 2 (2.1 %)                      | 1 (1.5 %)         | 1 (6.3 %)         | 0 (0 %)         |
| *26              | 9 (10.8 %)           | 8 (8.2 %)                      | 7 (10.8 %)        | 0 (0 %)           | 1 (6.3 %)       |
| *29              | 11 (13.3 %)          | 12 (12.4 %)                    | 7 (10.8 %)        | 4 (25.0 %)        | 1 (6.3 %)       |
| *30              | 13 (15.7 %)          | 11 (11.3 %)                    | 5 (7.7 %)         | 2 (12.5 %)        | 4 (25.0 %)      |
| *31              | 2 (2.4 %)            | 3 (3.1 %)                      | 2 (3.1 %)         | 1 (6.3 %)         | 0 (0 %)         |
| *32              | 5 (6.0 %)            | 5 (5.2 %)                      | 3 (4.6 %)         | 0 (0 %)           | 2 (12.5 %)      |
| *33              | 4 (4.8 %)            | 5 (5.2 %)                      | 2 (3.1 %)         | 3 (18.8 %)        | 0 (0 %)         |
| *68              | 12 (14.5 %)          | 11 (11.3 %)                    | 6 (9.2 %)         | 1 (6.3 %)         | 4 (25.0 %)      |
| <b>HLA-B *07</b> | 9 (10.8 %)           | 11 (11.3 %)                    | 6 (9.2 %)         | 3 (18.8 %)        | 2 (12.5 %)      |
| *08              | 9 (10.8 %)           | 12 (12.4 %)                    | 8 (12.3 %)        | 3 (18.8 %)        | 1 (6.3 %)       |
| *14              | 8 (9.6 %)            | 11 (11.3 %)                    | 7 (10.8 %)        | 3 (18.8 %)        | 1 (6.3 %)       |
| *15              | 7 (8.4 %)            | 10 (10.3 %)                    | 7 (10.8 %)        | 1 (6.3 %)         | 2 (12.5 %)      |
| *18              | 17 (20.5 %)          | 12 (12.4 %)                    | 8 (12.3 %)        | 1 (6.3 %)         | 3 (18.8 %)      |
| *27              | 3 (3.6 %)            | 1 (1.0 %)                      | 1 (1.5 %)         | 0 (0 %)           | 0 (0 %)         |
| *35              | <b>10 (12.0 %)</b>   | <b>33 (34.0 %)<sup>1</sup></b> | 23 (35.4 %)       | 4 (25.0 %)        | 6 (37.5 %)      |
| *38              | 6 (7.2 %)            | 10 (10.3 %)                    | 7 (10.8 %)        | 2 (12.5 %)        | 1 (6.3 %)       |
| *39              | 5 (6.0 %)            | 10 (10.3 %)                    | 7 (10.8 %)        | 1 (6.3 %)         | 2 (12.5 %)      |
| *40              | 10 (12.0 %)          | 9 (9.3 %)                      | 5 (7.7 %)         | 2 (12.5 %)        | 2 (12.5 %)      |
| *44              | 19 (22.9 %)          | 19 (19.6 %)                    | 14 (21.5 %)       | 4 (25.0 %)        | 1 (6.3 %)       |
| *49              | 11 (13.3 %)          | 5 (5.2 %)                      | 5 (7.7 %)         | 0 (0 %)           | 0 (0 %)         |
| *50              | 5 (6.0 %)            | 7 (7.2 %)                      | 5 (7.7 %)         | 1 (6.3 %)         | 1 (6.3 %)       |
| *51              | 15 (18.1 %)          | 7 (7.2 %)                      | 5 (7.7 %)         | 2 (12.5 %)        | 0 (0 %)         |
| *52              | 0 (0 %)              | 4 (4.1 %)                      | 3 (4.6 %)         | 0 (0 %)           | 1 (6.3 %)       |
| *53              | 3 (3.6 %)            | 6 (6.2 %)                      | 2 (3.1 %)         | 1 (6.3 %)         | 3 (18.8 %)      |
| *57              | 5 (6.0 %)            | 5 (5.2 %)                      | 3 (4.6 %)         | 2 (12.5 %)        | 0 (0 %)         |
| *58              | 4 (4.8 %)            | 0 (0 %)                        | 0 (0 %)           | 0 (0 %)           | 0 (0 %)         |
| <b>HLA-C*01</b>  | 2 (2.4 %)            | 9 (8.8 %)                      | 7 (10.0 %)        | 0 (0 %)           | 2 (12.5 %)      |
| *02              | 7 (8.4 %)            | 6 (5.9 %)                      | 3 (4.3 %)         | 1 (6.3 %)         | 2 (12.5 %)      |
| *03              | 9 (10.8 %)           | 11 (10.8 %)                    | 8 (11.4 %)        | 1 (6.3 %)         | 2 (12.5 %)      |
| *04              | <b>17 (20.5 %)</b>   | <b>34 (33.3 %)<sup>2</sup></b> | 22 (31.4 %)       | 4 (25.0 %)        | 8 (50.0 %)      |
| *05              | 20 (24.1 %)          | 20 (19.6 %)                    | 15 (21.4 %)       | 2 (12.5 %)        | 3 (18.8 %)      |
| *06              | 10 (12.0 %)          | 16 (15.7 %)                    | 10 (14.3 %)       | 3 (18.8 %)        | 3 (18.8 %)      |
| *07              | 35 (42.2 %)          | 34 (33.3 %)                    | 25 (35.7 %)       | 6 (37.5 %)        | 3 (18.8 %)      |
| *08              | 8 (9.6 %)            | 13 (12.7 %)                    | 9 (12.9 %)        | 3 (18.8 %)        | 1 (6.3 %)       |
| *12              | 11 (13.3 %)          | 23 (22.5 %)                    | 17 (24.3 %)       | 4 (25.0 %)        | 2 (12.5 %)      |
| *14              | 3 (3.6 %)            | 1 (1.0 %)                      | 1 (1.4 %)         | 0 (0 %)           | 0 (0 %)         |
| *15              | 10 (12.0 %)          | 7 (6.9 %)                      | 3 (4.3 %)         | 1 (6.3 %)         | 3 (18.8 %)      |
| *16              | 12 (14.5 %)          | 10 (9.8 %)                     | 5 (7.1 %)         | 4 (25.0 %)        | 1 (6.3 %)       |
| *17              | 6 (7.2 %)            | 1 (1.0 %)                      | 1 (1.4 %)         | 0 (0 %)           | 0 (0 %)         |

<sup>1</sup> All patients vs. Controls, p=0.0005, Pc=0.009; <sup>2</sup> All patients vs. Controls, p=0.037, Pc=0.185.

## Supplementary Figure S1

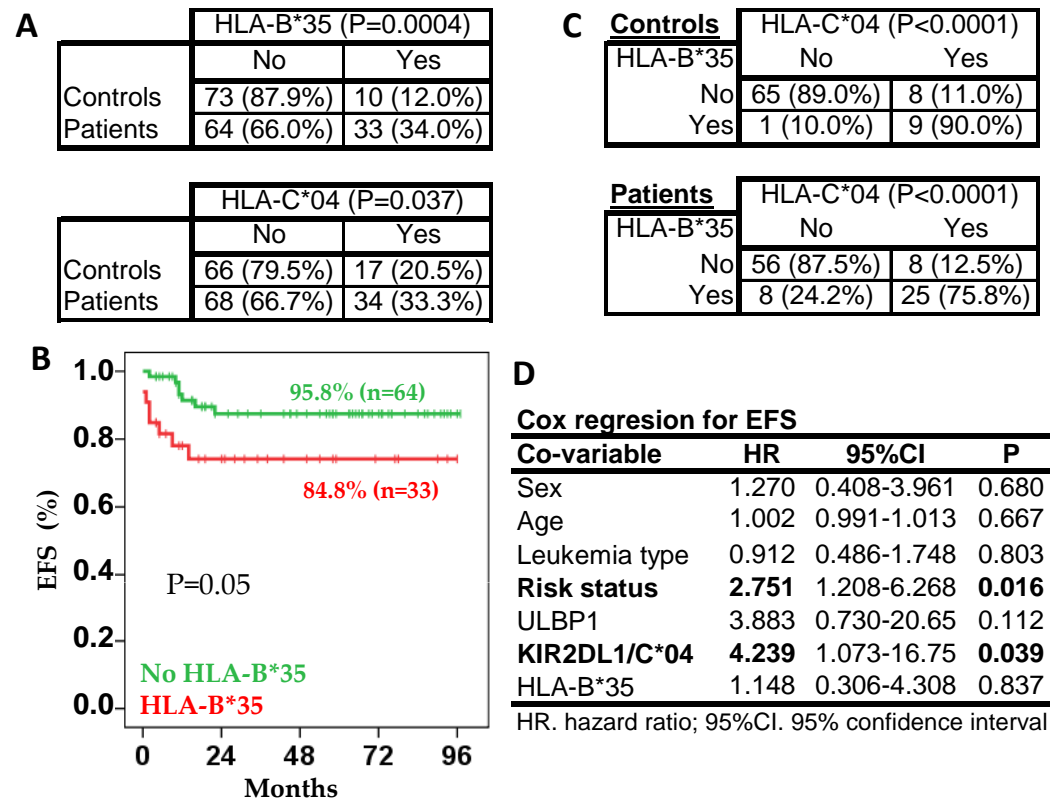

**Figure S1.** Reduced event-free survival (EFS) of acute leukemia patients associated with HLA-B\*35 is due to its linkage disequilibrium with HLA-C\*04. (a) Chi-squared test for HLA-B\*35 or HLA-C\*04 in controls and patients. Both HLA-B\*35 and HLA-C\*04 are significantly associated with acute leukemia. (b) Kaplan-Meier and Log-Rank tests for EFS of acute leukemia patients according to the presence of HLA-B\*35. HLA-B\*35 is associated with reduced EFS. (c) Chi-squared test for HLA-B\*35 and HLA-C\*04 in controls and patients. HLA-B\*35 is in linkage disequilibrium with HLA-C\*04 both in controls and in patients. KIR2DL1/HLA-C\*04 interaction results in reduced EFS in HLA-B\*35 patients. (d) Cox regression analysis for sex, age, leukemia type, ULBP expression on leukemic cells, KIR2DL1/HLA-C\*04 interaction and HLA-B\*35 allotype. KIR2DL1/HLA-C\*04 interaction and risk-status are independent prognostic factors, whereas HLA-B\*35 is not.

## Supplementary Figure S2

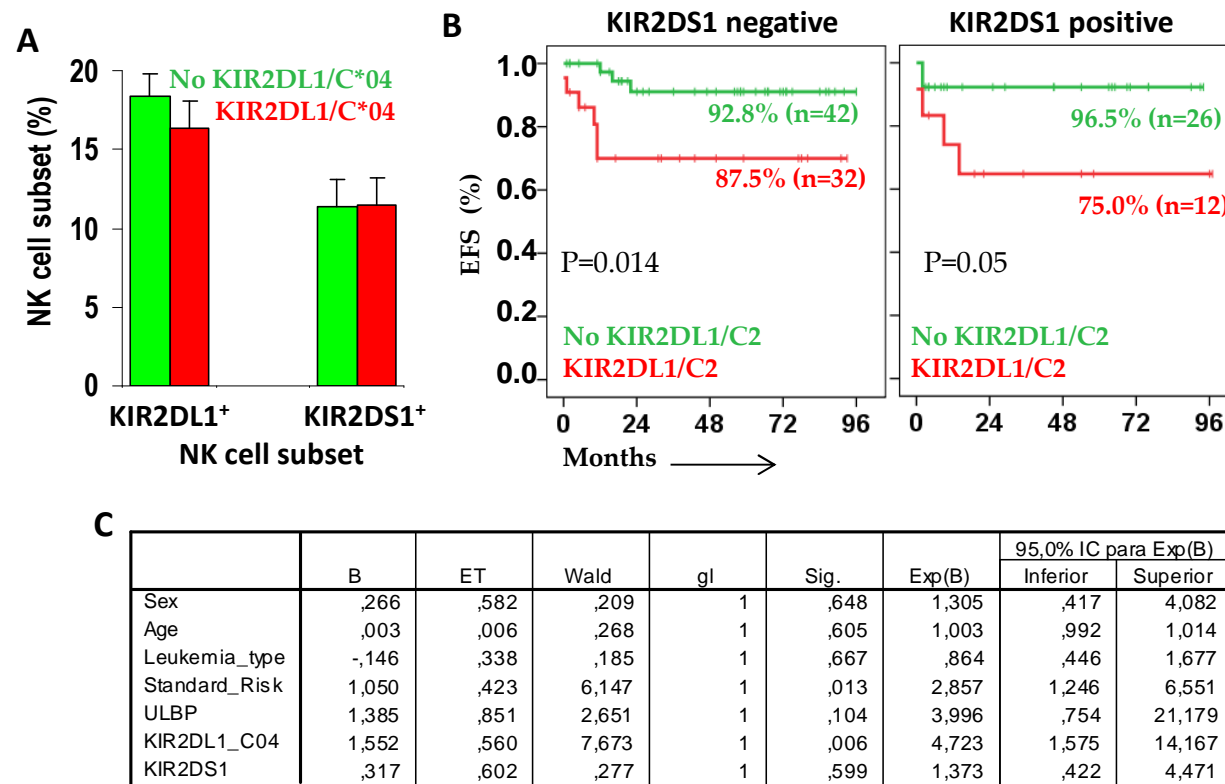

**Figure S2.** KIR2DS1 did not alter the event-free survival (EFS) curves of acute leukemia pediatric patients according to the presence of KIR2DL1/HLA-C\*04 interaction. (a) Frequency of NK cells expressing KIR receptors for HLA C2-epitope (inhibitory KIR2DL1 and activating KIR2DS1) in the peripheral blood of pediatric acute leukemia patients according to the absence or presence of the KIR2DL1/HLA-C\*04 interaction. (b) Kaplan-Meier and Log-Rank tests for EFS according to the presence of KIR2DL1/C\*04 interaction in KIR2DS1 negative and positive patients. (c) Cox regression analysis for sex, age, leukemia type, ULBP expression on leukemic cells, KIR2DL1/HLA-C\*04 interaction and presence of KIR2DS1 gene. The presence of KIR2DS1 gene did not alter the EFS curves according to the presence of KIR2DL1/HLA-C\*04 interaction.

Patient Type Inclusion Relapse Death Months TPH A3 Bw4 C HLA- KIR KIR KIR KIR KIR KIR A3 Bw4 C HLA- D->R alloreactivity

**Table-S2. Allogeneic stem cell transplantation performed in our series.**

| Patient Id        | Type leukemia | Cause of Inclusion | Relapse | Death | OS months | HSCT Type | Receptor HLA-ligands |     |      |          | Donor KIR and HLA-ligands |          |          |          |          |          |     |     |      |          | D->R alloreactivity models <sup>1</sup> |                        |
|-------------------|---------------|--------------------|---------|-------|-----------|-----------|----------------------|-----|------|----------|---------------------------|----------|----------|----------|----------|----------|-----|-----|------|----------|-----------------------------------------|------------------------|
|                   |               |                    |         |       |           |           | A3                   | Bw4 | C    | HLA-C*04 | KIR 2DL1                  | KIR 2DL2 | KIR 2DL3 | KIR 3DL1 | KIR 3DL2 | KIR 2DS1 | A3  | Bw4 | C    | HLA-C*04 | Receptor ligand                         | Ligand incompatibility |
| p050              | LMA           | Relapse            | Yes     | Yes   | 11        | Haplo     | No                   | No  | C1C2 | Yes      | 1                         | 0        | 1        | 1        | 1        | 0        | No  | Yes | C2C2 | Yes      | 3DL1 & 3DL2                             | 3DL1                   |
| p070              | LMA           | Relapse            | Yes     | Yes   | 29        | Haplo     | Yes                  | No  | C2C2 | Yes      | 1                         | 1        | 1        | 1        | 1        | 0        | Yes | No  | C2C2 | Yes      | 2DL2/L3 & 3DL1                          | None                   |
| p014              | LLA-B         | Relapse            | No      | Yes   | 1         | UD        | Yes                  | No  | C1C2 | Yes      | 1                         | 1        | 1        | 1        | 1        | 0        | Yes | No  | C1C2 | Yes      | 3DL1                                    | None                   |
| p040              | LLA-B         | Relapse            | No      | Yes   | 11        | UD        | No                   | Yes | C2C2 | Yes      | 1                         | 0        | 1        | 1        | 1        | 0        | No  | Yes | C2C2 | Yes      | 2DL3 & 3DL2                             | None                   |
| p056              | LLA-B         | Relapse            | No      | No    | 50        | Haplo     | No                   | No  | C1C2 | Yes      | 1                         | 1        | 1        | 0        | 1        | 1        | No  | No  | C1C2 | Yes      | 3DL2 & 2DS1                             | 2DS1                   |
| p002 <sup>2</sup> | LMA           | New diagnosis      | Yes     | No    | 26        | UD        | No                   | No  | C1C2 | No       | 1                         | 1        | 1        | 1        | 1        | 1        | No  | No  | C1C2 | No       | 3DL1/L2 & 2DS1                          | 2DS1                   |
|                   |               |                    | Yes     | Yes   |           | Haplo     |                      |     |      |          | 1                         | 0        | 1        | 1        | 1        | 0        | No  | Yes | C1C2 | No       | 3DL1 & 3DL2                             | 3DL1                   |
| p007              | LMA           | New diagnosis      | Yes     | Yes   | 14        | RD        | Yes                  | No  | C2C2 | Yes      | 1                         | 0        | 1        | 1        | 1        | 1        | Yes | No  | C2C2 | Yes      | 2DL3 & 3DL1                             | None                   |
| p017              | LLA-B         | New diagnosis      | Yes     | No    | 86        | Haplo     | No                   | No  | C1C2 | No       | 1                         | 0        | 1        | 1        | 1        | 1        | No  | No  | C2C2 | No       | 3DL1 & 3DL2                             | None                   |
| p030              | LLA-T         | New diagnosis      | Yes     | No    | 75        | RD        | No                   | No  | C2C2 | Yes      | 1                         | 0        | 1        | 1        | 1        | 1        | No  | Yes | C2C2 | Yes      | 2DL3 & 3DL1/L2                          | 3DL1                   |
| p006              | LMA           | New diagnosis      | No      | No    | 94        | UD        | Yes                  | Yes | C1C2 | No       | 1                         | 0        | 1        | 1        | 1        | 0        | Yes | Yes | C1C2 | No       | None                                    | None                   |
| p009              | LLA-T         | New diagnosis      | No      | No    | 93        | UD        | No                   | Yes | C1C2 | No       | 1                         | 1        | 1        | 1        | 1        | 1        | No  | Yes | C1C2 | No       | 3DL2 & 2DS1                             | 2DS1                   |
| p010              | LLA-B         | New diagnosis      | No      | No    | 92        | RD        | No                   | Yes | C1C2 | No       | 1                         | 0        | 1        | 1        | 1        | 0        | No  | Yes | C1C2 | No       | 3DL2                                    | None                   |
| p049              | LMA           | New diagnosis      | No      | No    | 58        | UD        | No                   | No  | C2C2 | Yes      | 1                         | 1        | 1        | 1        | 1        | 0        | No  | Yes | C2C2 | Yes      | 2DL2/L3 & 3DL1/L2                       | 3DL1                   |
| p063              | LLA-B         | New diagnosis      | No      | No    | 43        | RD        | Yes                  | No  | C1C2 | Yes      | 1                         | 1        | 1        | 1        | 1        | 0        | Yes | No  | C1C2 | Yes      | 3DL1                                    | None                   |
| p068              | LLA-T         | New diagnosis      | No      | No    | 32        | RD        | No                   | Yes | C1C2 | Yes      | 1                         | 1        | 1        | 1        | 1        | 1        | No  | Yes | C1C2 | Yes      | 3DL2 & 2DS1                             | 2DS1                   |
| p078              | LLA-B         | New diagnosis      | No      | No    | 21        | UD        | No                   | No  | C1C2 | No       | 1                         | 1        | 1        | 1        | 1        | 0        | No  | Yes | C1C2 | No       | 3DL1 & 3DL2                             | 3DL1                   |
| p084              | LLA-B         | New diagnosis      | No      | No    | 17        | Haplo     | No                   | No  | C1C2 | Yes      | 1                         | 1        | 1        | 1        | 1        | 0        | No  | Yes | C1C1 | No       | 3DL1 & 3DL2                             | 3DL1                   |
| p086              | LMA           | New diagnosis      | No      | No    | 15        | UD        | No                   | No  | C1C1 | No       | 1                         | 0        | 1        | 1        | 1        | 1        | No  | No  | C1C1 | No       | 2DL1 & 3DL1/L2                          | None                   |

HSCT: stem cell transplantation; Haplo: haploidentical HSCT; RD: related donor; UD: unrelated donor; OS: overall survival.

<sup>1</sup> Symons HJ et cols. Biol Blood Marrow Transplant 2010;16(4):533-42. doi: 10.1016/j.bbmt.2009.11.022.

<sup>2</sup> This patient received UD-HSCT and Haplo-HSCT after relapsing.

### Cumulative incidence

| Models                 |    | Relapse | Death |
|------------------------|----|---------|-------|
| Receptor Lig,          | n  | %       | %     |
| KIR2DL1                | 1  | 0%      | 0%    |
| KIR2DS1                | 4  | 25%     | 0%    |
| KIR3DL2                | 13 | 31%     | 23%   |
| KIR3DL1                | 13 | 54%     | 38%   |
| KIR2DL2/L3             | 4  | 50%     | 50%   |
| Ligand incompatibility |    |         |       |
| KIR2DS1                | 4  | 25%     | 0%    |
| KIR3DL1                | 6  | 50%     | 33%   |
| None                   | 9  | 44%     | 44%   |
